# Supplementary figures and images for: Selective analysis of newly synthesized proteins by combining fluorescence correlation spectroscopy with bioorthogonal non-canonical amino acid tagging
Source: Royal Society of Chemistry journal article supplement (doi:10.1039/d0an01697g), 2020-10-14

a

HPG (50 $\mu$ M)  
Time (h): 12 10 8 6 4 2 0 Marker

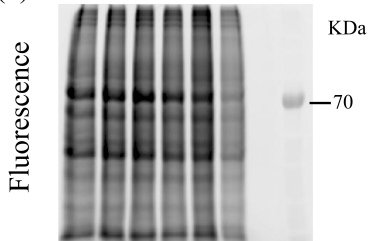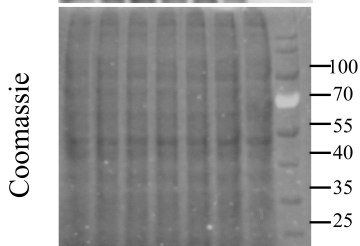

b

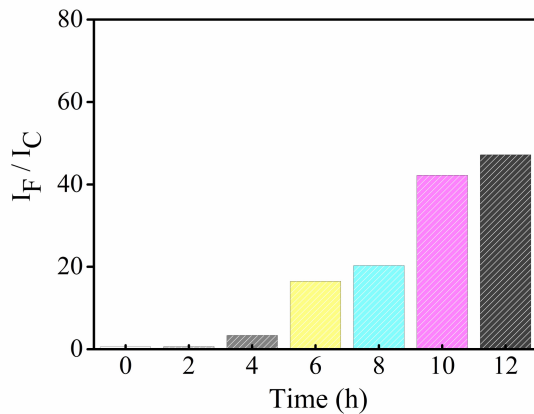

Supplement: d0an01697g4.pdf [file d0an01697g4.pdf]

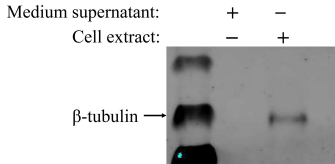

Supplement: d0an01697g6.pdf [file d0an01697g6.pdf]
